# Supplementary material for: Dynamical Consequences of Bandpass Feedback Loops in a Bacterial Phosphorelay
Source: PubMed Central journal article supplement (PMC3182994; doi:10.1371/journal.pone.0025102), 2011-09-29

Figure S1

**A**

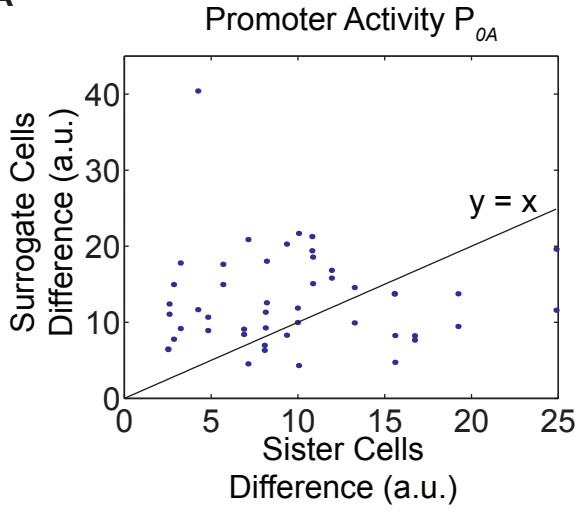

**B**

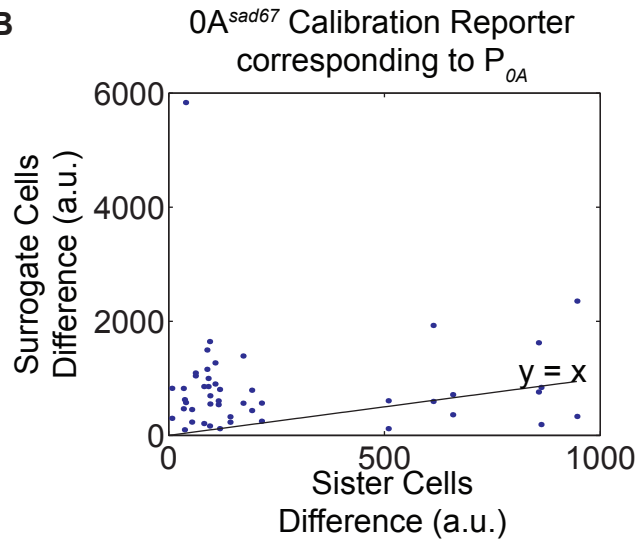

**C**

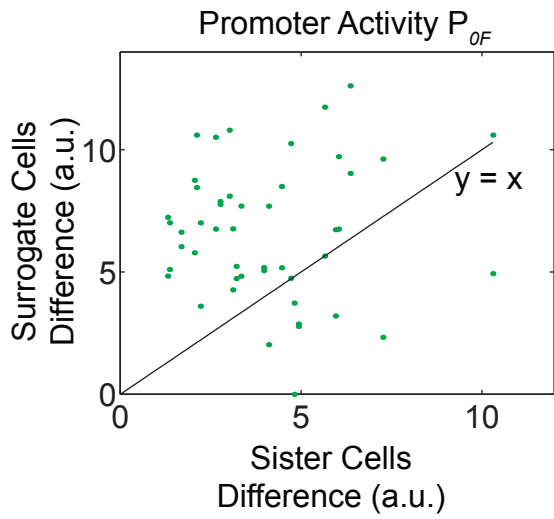

**D**

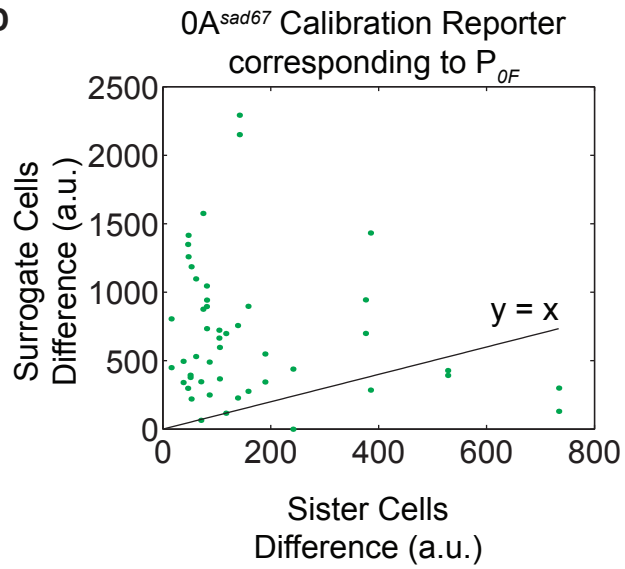

Supplement: pone.0025102.s002.pdf [file pone.0025102.s002.pdf]
