# Supplementary material for: Dynamical Consequences of Bandpass Feedback Loops in a Bacterial Phosphorelay
Source: PubMed Central journal article supplement (PMC3182994; doi:10.1371/journal.pone.0025102), 2011-09-29

Figure S5

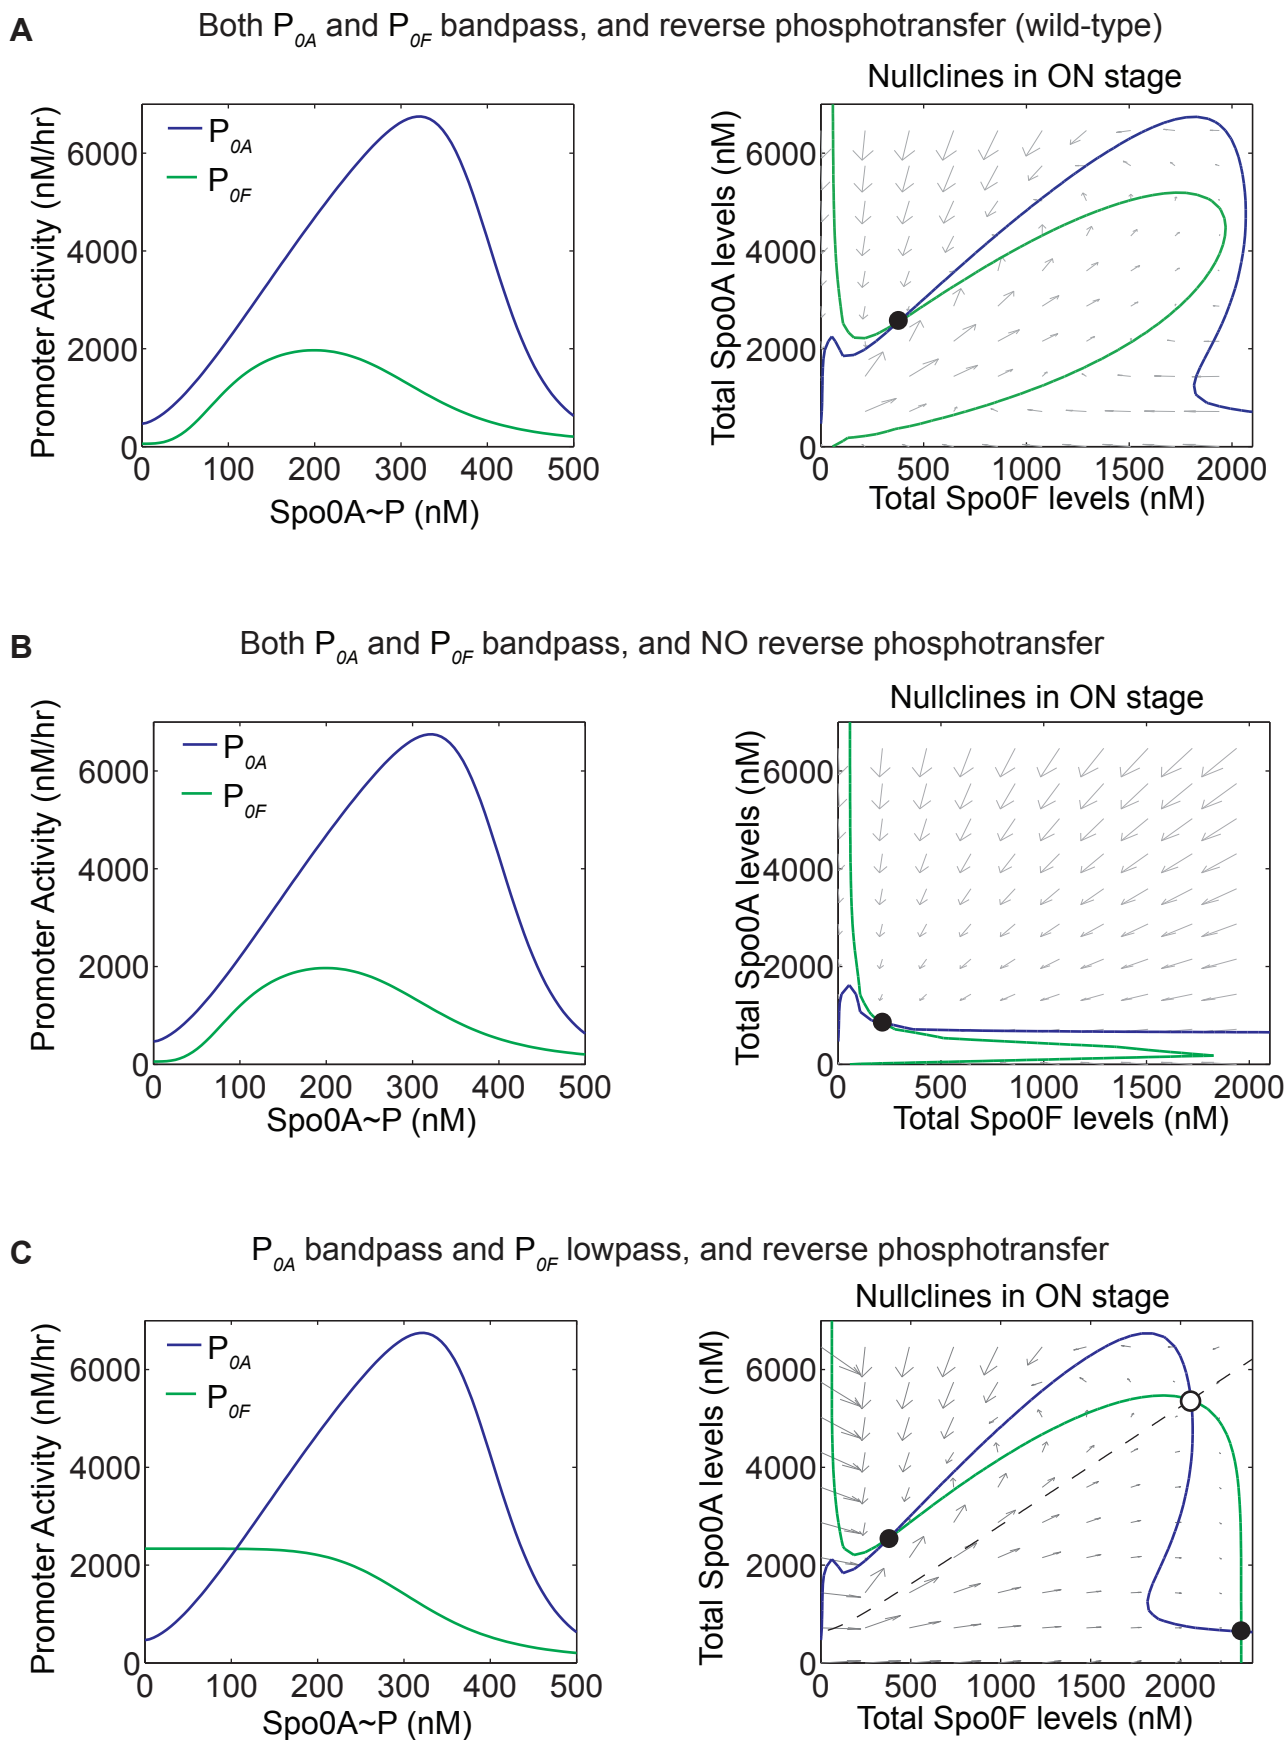

Figure S5

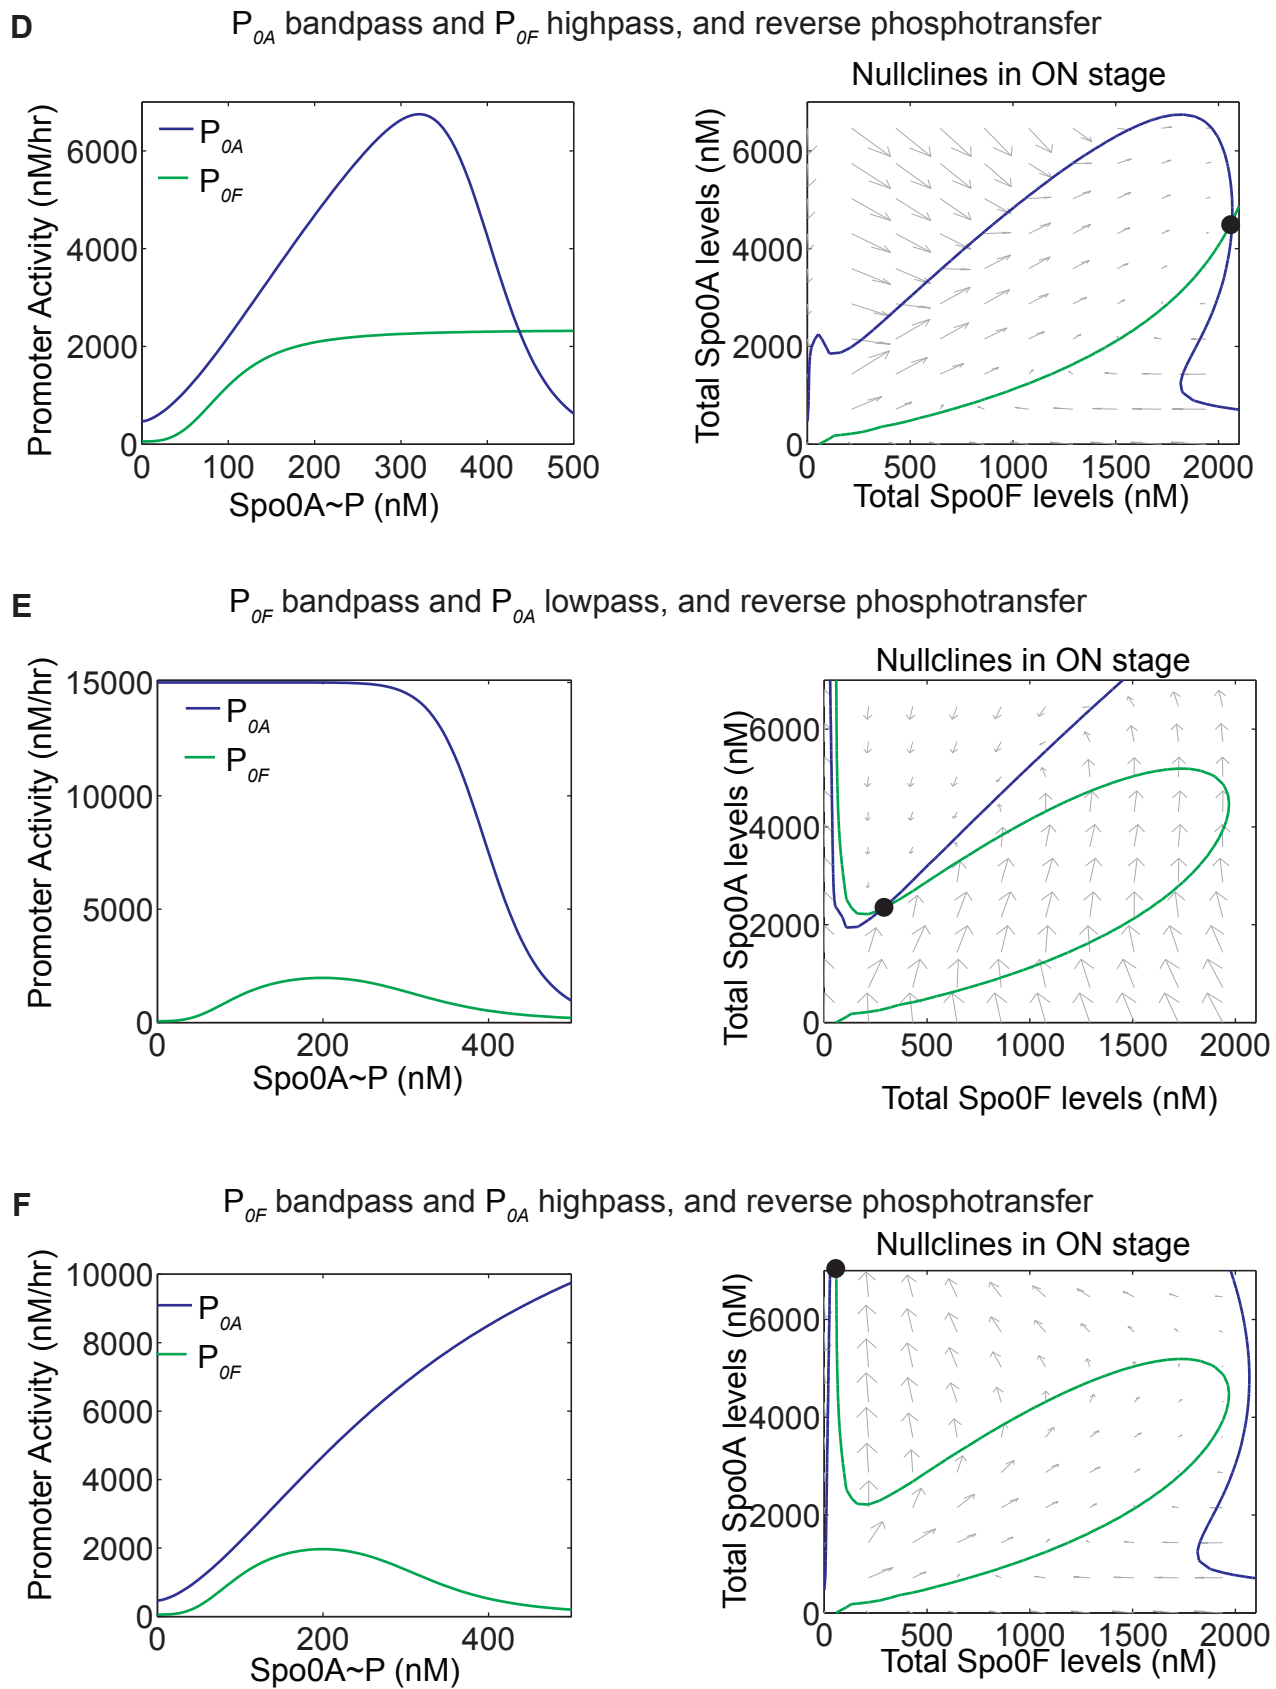

Supplement: pone.0025102.s006.pdf [file pone.0025102.s006.pdf]
